# Supplementary material for: Social Role Stress, Reward, and the American Heart Association Life’s Simple 7 in Midlife Women: The Study of Women’s Health Across the Nation
Source: PubMed Central journal article supplement — J Am Heart Assoc. 2020 Dec 11;9(24):e017489. doi: 10.1161/JAHA.120.017489 (PMC7955397; doi:10.1161/jaha.120.017489), 2020-12-11
Supplement: JAH3-9-e017489-s001.pdf [file JAH3-9-e017489-s001.pdf]

# **SUPPLEMENTAL MATERIAL**

Table S1. American Heart Association Life's simple 7 criteria for ideal cardiovascular health.

| <b>Metric</b>     | <b>Method</b>                                   | <b>SWAN visits with data</b>                  | <b>Poor</b>                                  | <b>Intermediate</b>                                                                                                                                                     | <b>Ideal</b>                                                                                                                                                                              |
|-------------------|-------------------------------------------------|-----------------------------------------------|----------------------------------------------|-------------------------------------------------------------------------------------------------------------------------------------------------------------------------|-------------------------------------------------------------------------------------------------------------------------------------------------------------------------------------------|
| Glucose           | Blood test and medication data                  | BL, 1, 3, 4, 5, 6, 7 <sup>^</sup>             | Fasting serum glucose (FSG) $\geq 126$ mg/dL | FSG 100-125 mg/dL or treated to $< 100$ mg/dL                                                                                                                           | $< 100$ mg/dL, no medication                                                                                                                                                              |
| Cholesterol       | Blood test and medication data                  | BL, 1, 3, 4, 5, 6, 7 <sup>^</sup>             | Total cholesterol $\geq 240$ mg/dL           | 200-239 mg/dL or treated to $< 200$ mg/dL                                                                                                                               | $< 200$ mg/dL, no medication                                                                                                                                                              |
| BMI               | Anthropometric measurements                     | BL, 1, 2, 3, 4, 5, 6, 8                       | $\geq 30$ kg/m <sup>2</sup>                  | 25-30 kg/m <sup>2</sup>                                                                                                                                                 | $< 25$ kg/m <sup>2</sup>                                                                                                                                                                  |
| Blood pressure    | Anthropometric measurements and medication data | BL, 1, 2, 3, 4, 5, 6, 8                       | $\geq 140$ SBP or $\geq 90$ DBP              | 120-139 SPB or 80-89 DBP or treated to $< 120 / < 80$                                                                                                                   | $< 120 / < 80$ , no medication                                                                                                                                                            |
| Physical activity | Kaiser Physical Activity Survey                 | BL <sup>*,^</sup> , 3, 5, 6, 9 <sup>*,^</sup> | Inactive                                     | 1-149 min/wk MVPA or 1-75 min/wk vigorous (exercising $> 1x$ week for 0-2 hours, for $> 4$ months of the past year, with a moderate to vigorous increase in heart rate) | $\geq 150$ MVPA or $\geq 75$ min/wk vigorous (exercising $> 1x$ week, for $\geq 2$ hrs/week, for more than 4 months of the past year, with a moderate to vigorous increase in heart rate) |
| Diet <sup>†</sup> | Modified Block food frequency questionnaire     | BL <sup>*,^</sup> , 5, 9 <sup>*,^</sup>       | 0-1 components                               | 2-3 components                                                                                                                                                          | 4-5 components                                                                                                                                                                            |
| Smoking           | Questionnaire                                   | BL, 1, 2, 3, 4, 5, 6, 8                       | Current                                      | Former $\leq 12$ months                                                                                                                                                 | Never or quit $> 12$ months                                                                                                                                                               |

<sup>^</sup>=data from this visit carried forward (or backwards) for calculation of AHA S7 score, number of ideal components outcomes

<sup>\*</sup>= data from this visit carried forward (or backwards) for component-specific analyses

<sup>†</sup>5 components: fruits & vegetables  $\geq 4.5$  cups per day, fish  $\geq 2$  servings per week, fiber-rich whole grains  $\geq 3$  servings/day, sodium  $< 1500$  mg/day, sugar-sweetened beverages  $\leq 450$  kcal/day

Note: The Multiple Role Questionnaire was administered at SWAN visits 1, 2, 3, 4, 5, 6, and 8

Acronyms: BL: baseline; FSG: Fasting serum glucose; SBP: systolic blood pressure; DBP: diastolic blood pressure; MVPA: Moderate to vigorous physical activity; SWAN: Study of Women's Health Across the Nation
